# Supplementary material for: Use of Graph Database for the Integration of Heterogeneous Biological Data
Source: PubMed Central journal article supplement — Genomics Inform. 2017 Mar 29;15(1):19–27. doi: 10.5808/GI.2017.15.1.19 (PMC5389944; doi:10.5808/gi.2017.15.1.19), 2017-03-29
Supplement: gni-15-19-s001.pdf [file gni-15-19-s001.pdf]

## SUPPLEMENTARY INFORMATION

### Use of Graph Database for the Integration of Heterogeneous Biological Data

**Byoung-Ha Yoon<sup>1,2</sup>, Seon-Kyu Kim<sup>1</sup>, Seon-Young Kim<sup>1,2\*</sup>**

<sup>1</sup>Personalized Genomic Medicine Research Center, Korea Research Institute of Bioscience and Biotechnology (KRIBB), Daejeon 34141, Korea,

<sup>2</sup>Department of Functional Genomics, University of Science and Technology (UST), Daejeon 34113, Korea

# Supplementary Fig. 1

## Neo4j Cypher query

```
MATCH (drug)-[r:Drug_Gene_Interaction {role:'increases^expression'}]->
(gene:Gene {GeneSymbol:'BRCA1'})-[r1]->(disease)
WHERE disease.DiseaseName =~ '.*[Cc](ancer|ANCER).*'
RETURN drug, r, gene, r1, disease
```

**Supplementary Figure 1. Cypher query to retrieve the relationships among genes, drugs, and diseases that increased the expression of the BRCA1 gene.**
