# Supplementary material for: Use of Graph Database for the Integration of Heterogeneous Biological Data
Source: PubMed Central journal article supplement — Genomics Inform. 2017 Mar 29;15(1):19–27. doi: 10.5808/GI.2017.15.1.19 (PMC5389944; doi:10.5808/gi.2017.15.1.19), 2017-03-29
Supplement: gni-15-19-s002.pdf [file gni-15-19-s002.pdf]

## SUPPLEMENTARY INFORMATION

### Use of Graph Database for the Integration of Heterogeneous Biological Data

**Byoung-Ha Yoon<sup>1,2</sup>, Seon-Kyu Kim<sup>1</sup>, Seon-Young Kim<sup>1,2\*</sup>**

<sup>1</sup>Personalized Genomic Medicine Research Center, Korea Research Institute of Bioscience and Biotechnology (KRIBB), Daejeon 34141, Korea,

<sup>2</sup>Department of Functional Genomics, University of Science and Technology (UST), Daejeon 34113, Korea

## Supplementary Fig. 2

### 3 layer search

#### MySQL query

```
SELECT A.DrugName, A.GeneSymbol, B.DiseaseName FROM Drug_Gene_Interaction A
INNER JOIN Gene_Disease_Association B ON A.GeneSymbol = B.GeneSymbol
WHERE A.role='increases^expression' and B.DiseaseName like '%cancer%';
```

#### Neo4j Cypher query

```
MATCH (drug)-[r:Drug_Gene_Interaction {role:'increases^expression'}]->
(gene:Gene {GeneSymbol:'BRCA1'})-[r1]->(disease)
WHERE disease.DiseaseName =~ '.*[Cc](ancer|ANCER).*'
RETURN drug, r, gene, r1, disease
```

### 4 layer search

#### MySQL query

```
SELECT A.GeneName, B.ProteinName, C.PathwayName, D.DiseaseName FROM Gene_Protein_Interaction A,
Protein_Disease_interaction B, Pathway_interaction C, Disease_associated D
WHERE A.GeneName=B.GeneName and B.ProteinName=D.ProteinName and A.GeneName=C.GeneName and
D.GeneName=A.GeneName and B.ProteinName=D.ProteinName and C.PathwayName='%SIGNALING%' and
(D.DiseaseName='HYPERTENSION' or D.DiseaseName='ESSENTIAL');
```

#### Neo4j Cypher query

```
MATCH (gene)-[r1:DEG_RELATED_TO]-(p:Protein)-[r2:PART_OF]->(d:Disease),(p:Protein)-
[r3:IN_PATHWAY]->(path:Pathway), (p:Protein)-[r4:BIOMARKER]->(d:Disease)
WHERE (d.DiseaseName IN ['HYPERTENSION','ESSENTIAL']) AND path.PathwayName =~ '.*SIGNALING.*'
AND (d.DiseaseName =~ '.*[Cc](ancer|ANCER).*') return r1,r2,r3,r4
```
